# Supplementary material for: High performance SERS active substrates fabricated by directly growing graphene on Ag nanoparticles
Source: Royal Society of Chemistry journal article supplement (doi:10.1039/c5ra18333b), 2015-01-01
Supplement: c5ra18333b1.pdf [file c5ra18333b1.pdf]

**Supporting Information for**

**High performance SERS active substrates fabricated by directly  
growing graphene on Ag nanoparticles**

Shicai Xu<sup>\*a</sup>, Jihua Wang<sup>\*a</sup>, Yan Zou<sup>a</sup>, Hanping Liu<sup>a</sup>, Guiying Wang<sup>a</sup>, Xiumei Zhang<sup>a</sup>,  
Shouzhen Jiang<sup>b</sup>, Zhen Li<sup>b</sup>, Dongyan Cao<sup>a</sup>, Rongxia Tang<sup>a</sup>

<sup>a</sup> College of Physics and Electronic Information, Shandong Provincial Key Laboratory  
of Biophysics, Dezhou University, Dezhou 253023, China

<sup>b</sup> School of Physics and Electronics, Shandong Normal University, Jinan 250014  
China

E-mail address: [shicaixu@dzu.edu.cn](mailto:shicaixu@dzu.edu.cn) (S.C. Xu); [jhw25336@126.com](mailto:jhw25336@126.com) (J.H. Wang)

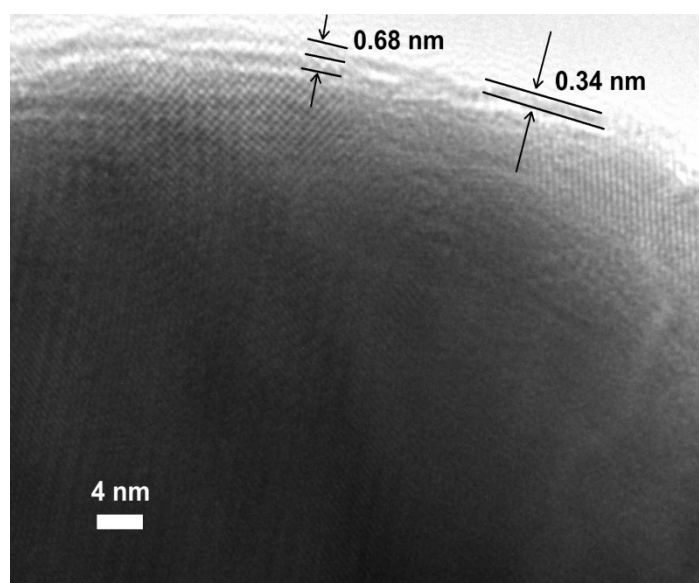

**Figure S1.** HRTEM image of G/AgNPs nearby interface of graphene and AgNPs.

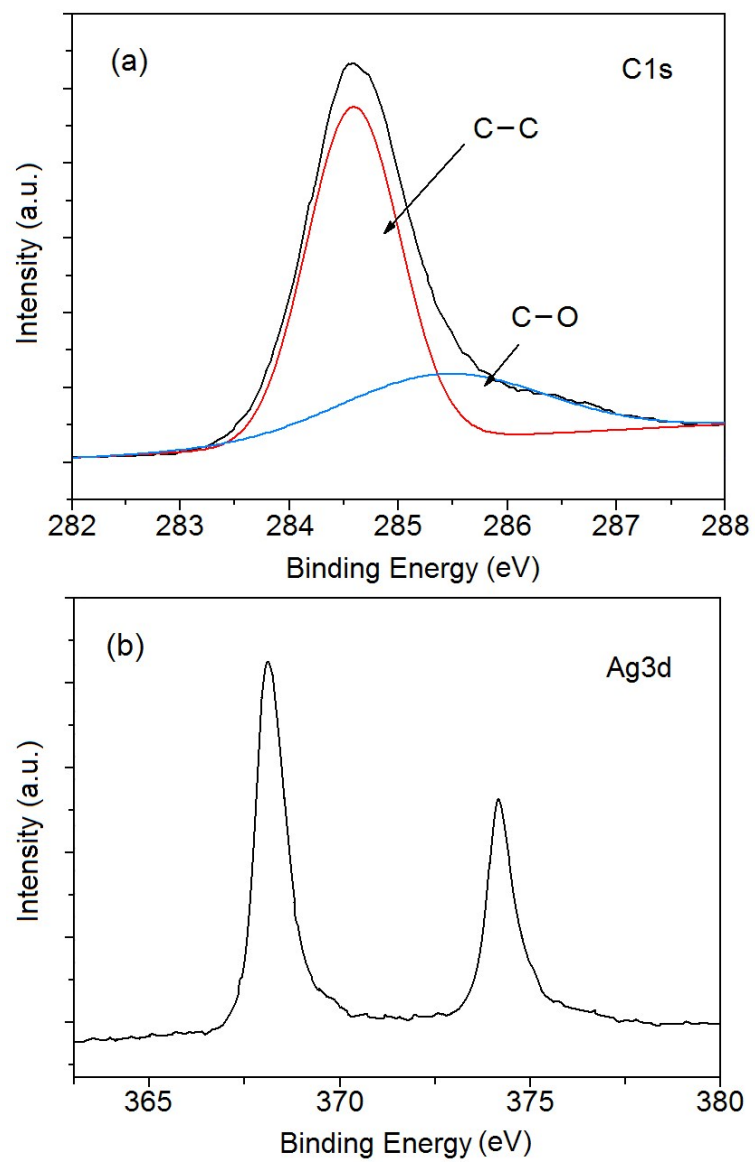

**Figure S2.** XPS of G/Ag NPs. (a)  $C_{1s}$  peak of G/AgNPs. (b)  $Ag_{3d}$  peak for G/AgNPs.

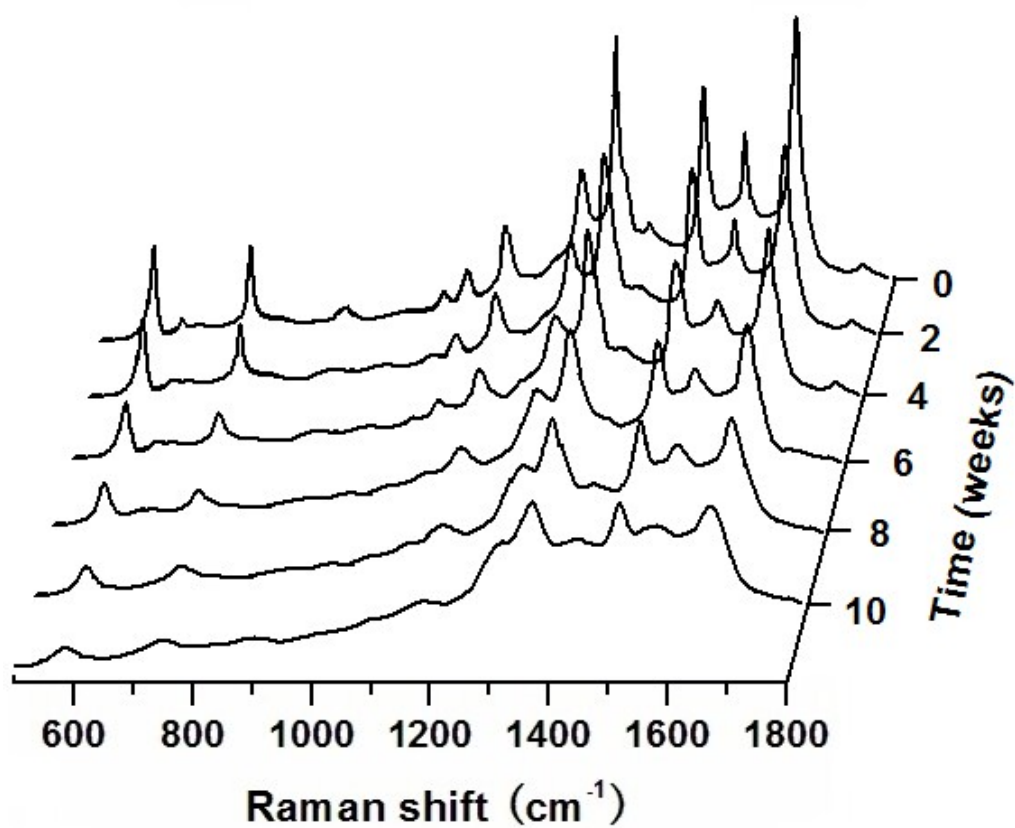

**Figure S3.** SERS spectra of  $10^{-7}$  M R6G were recorded from bare AgNP substrates stored over a number of weeks under ambient conditions.

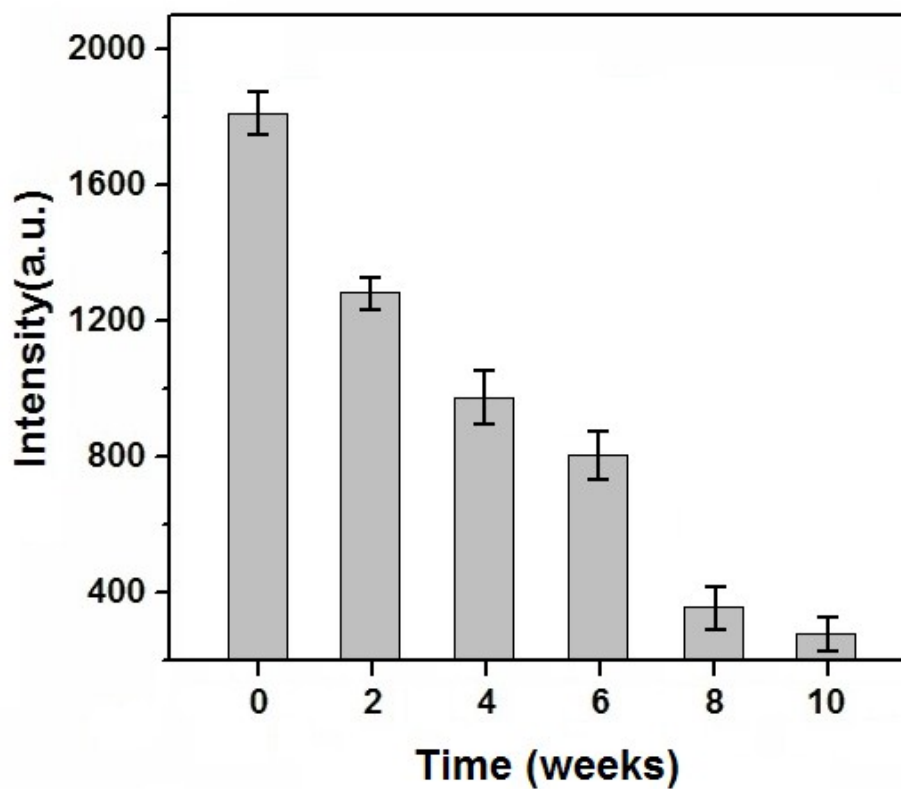

**Figure S4.** Intensity of 10<sup>-7</sup> M R6G recorded from bare AgNP substrates versus stored time based on the measurement at 613 cm<sup>-1</sup> over 10 weeks. Error bars show the standard deviations.
